# Supplementary material for: Tissue- and Population-Level Microbiome Analysis of the Wasp Spider Argiope bruennichi Identified a Novel Dominant Bacterial Symbiont
Source: MDPI journal article supplement (doi:10.3390/microorganisms8010008), 2019-12-19

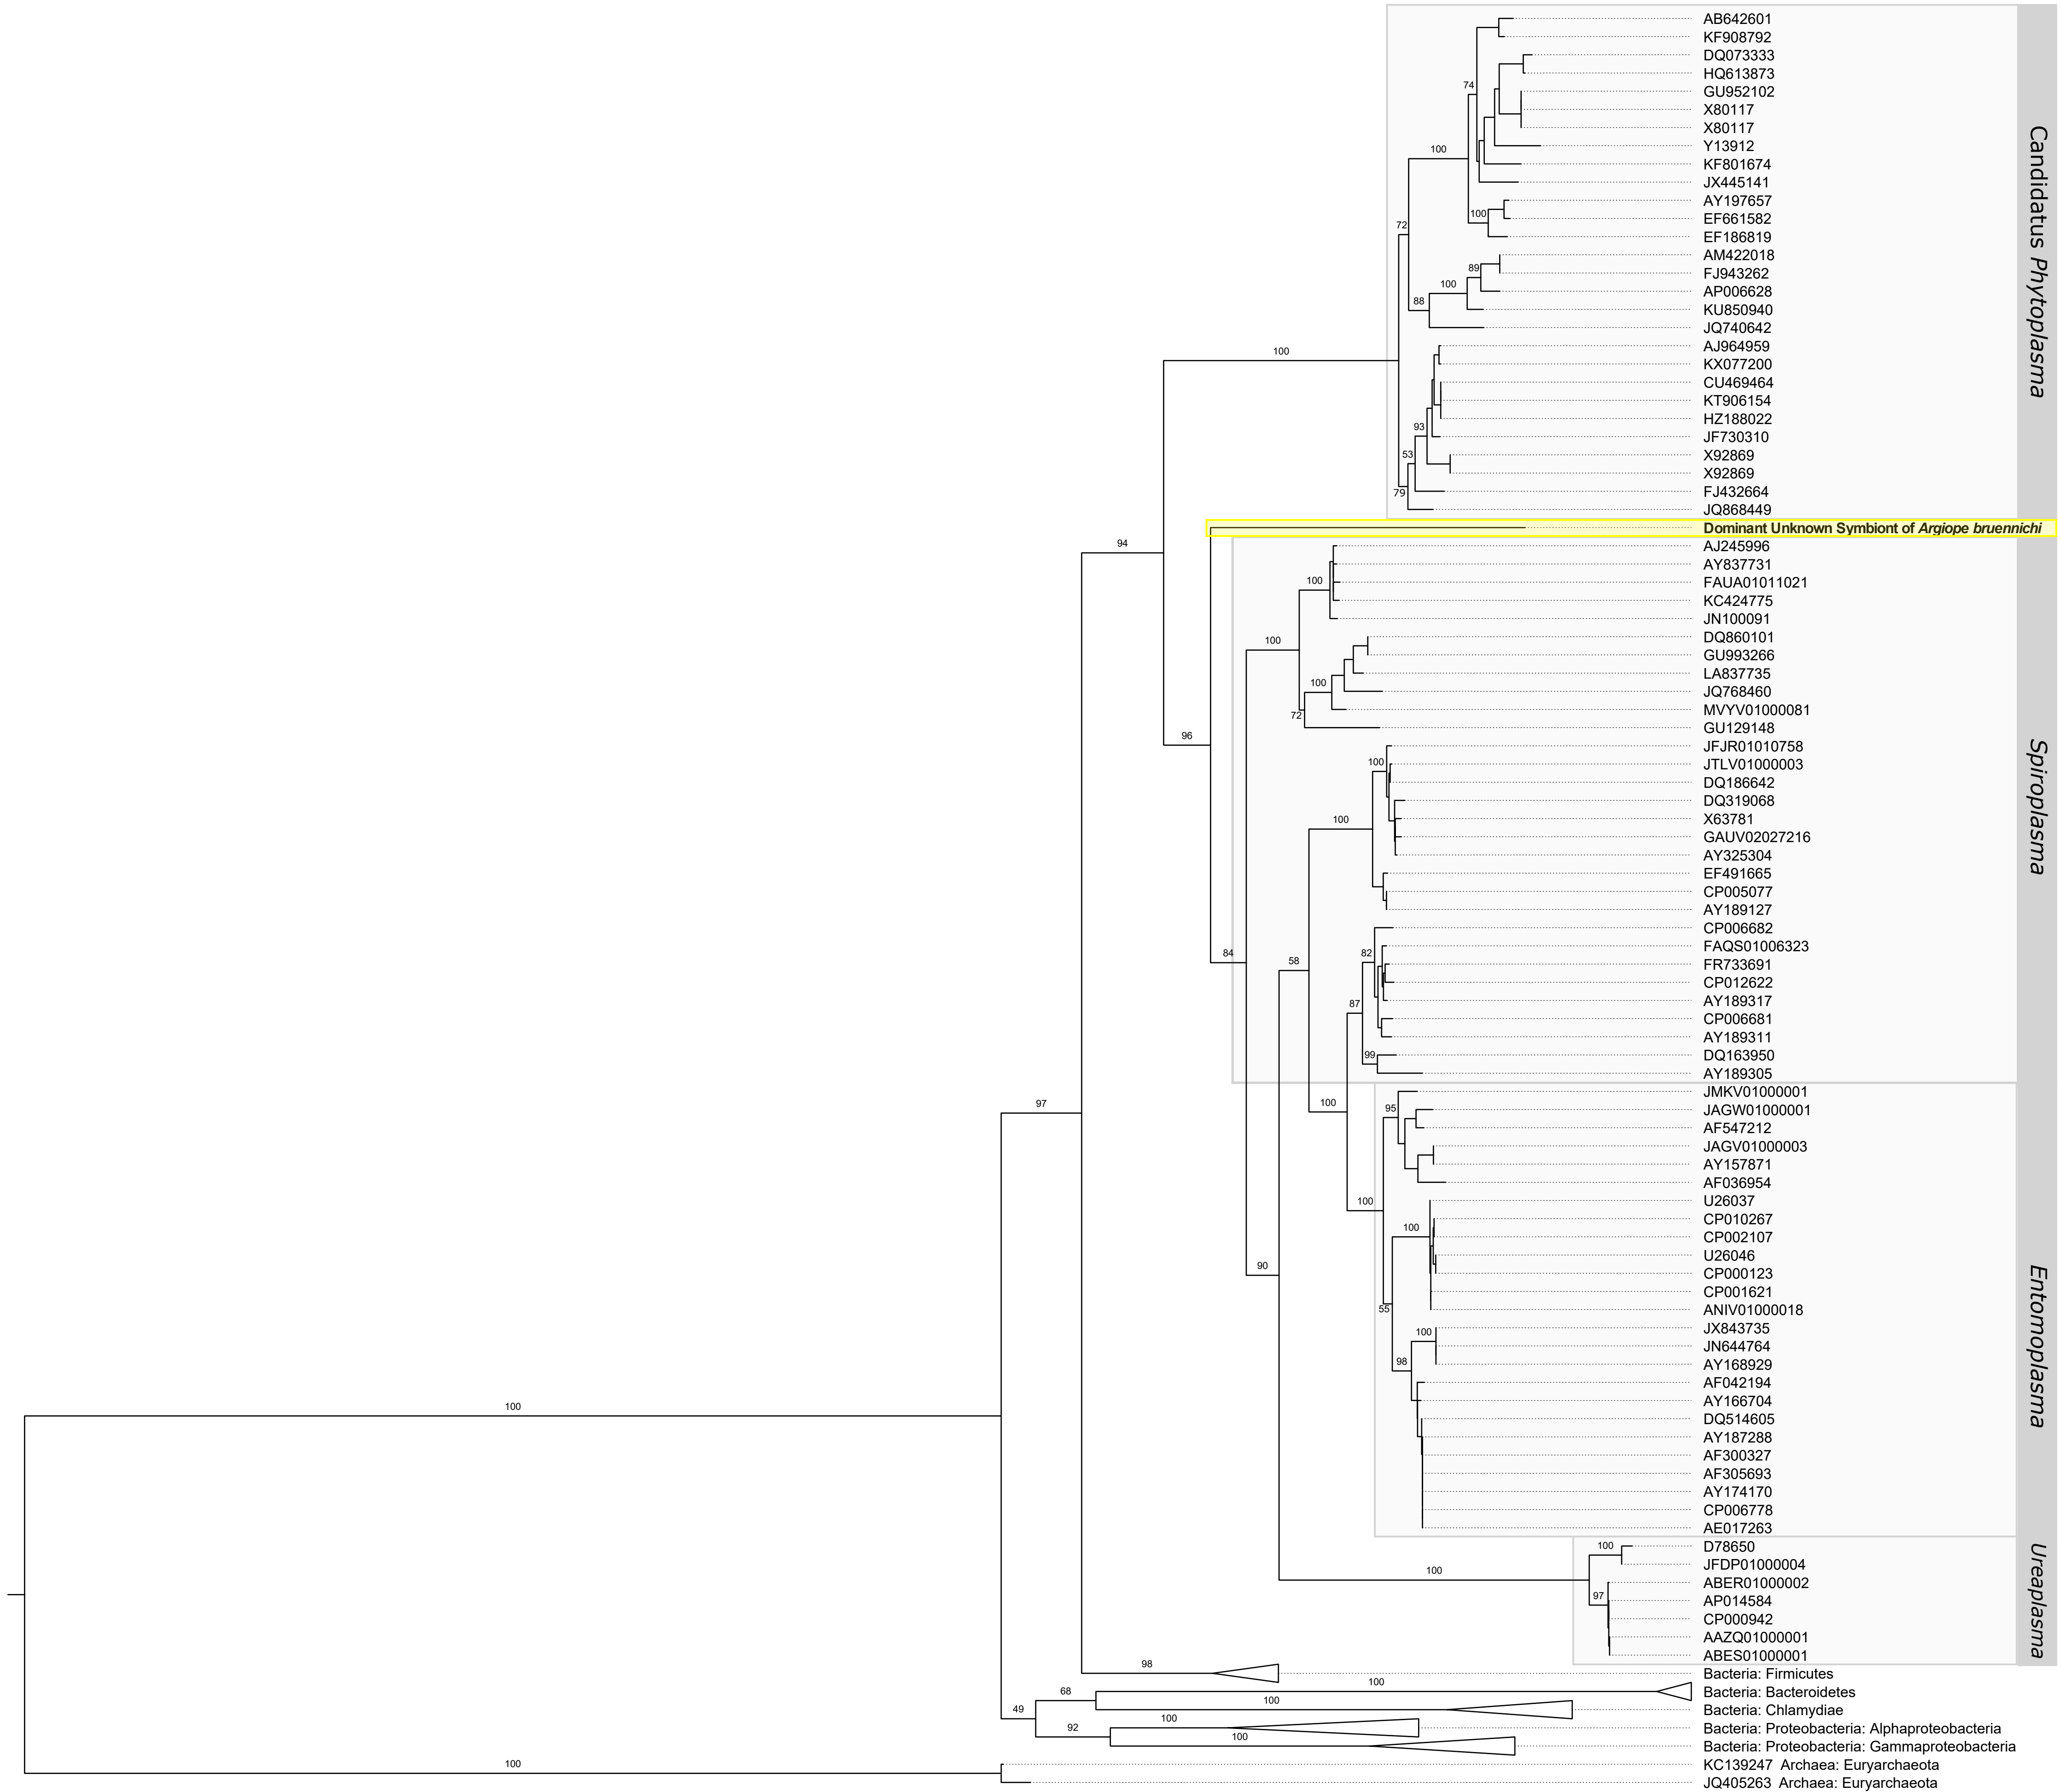

Supplement: s1 [file s1]
